# Supplementary material
Source: PubMed Central journal article supplement (PMC2518231)
Supplement: tpc.107.056093_1.pdf [file tpc.107.056093_1.pdf]

**Supplemental Data.** Dou et al. (2008) RXLR-mediated entry of *Phytophthora sojae* effector Avr1b into soybean cells does not require pathogen encoded machinery

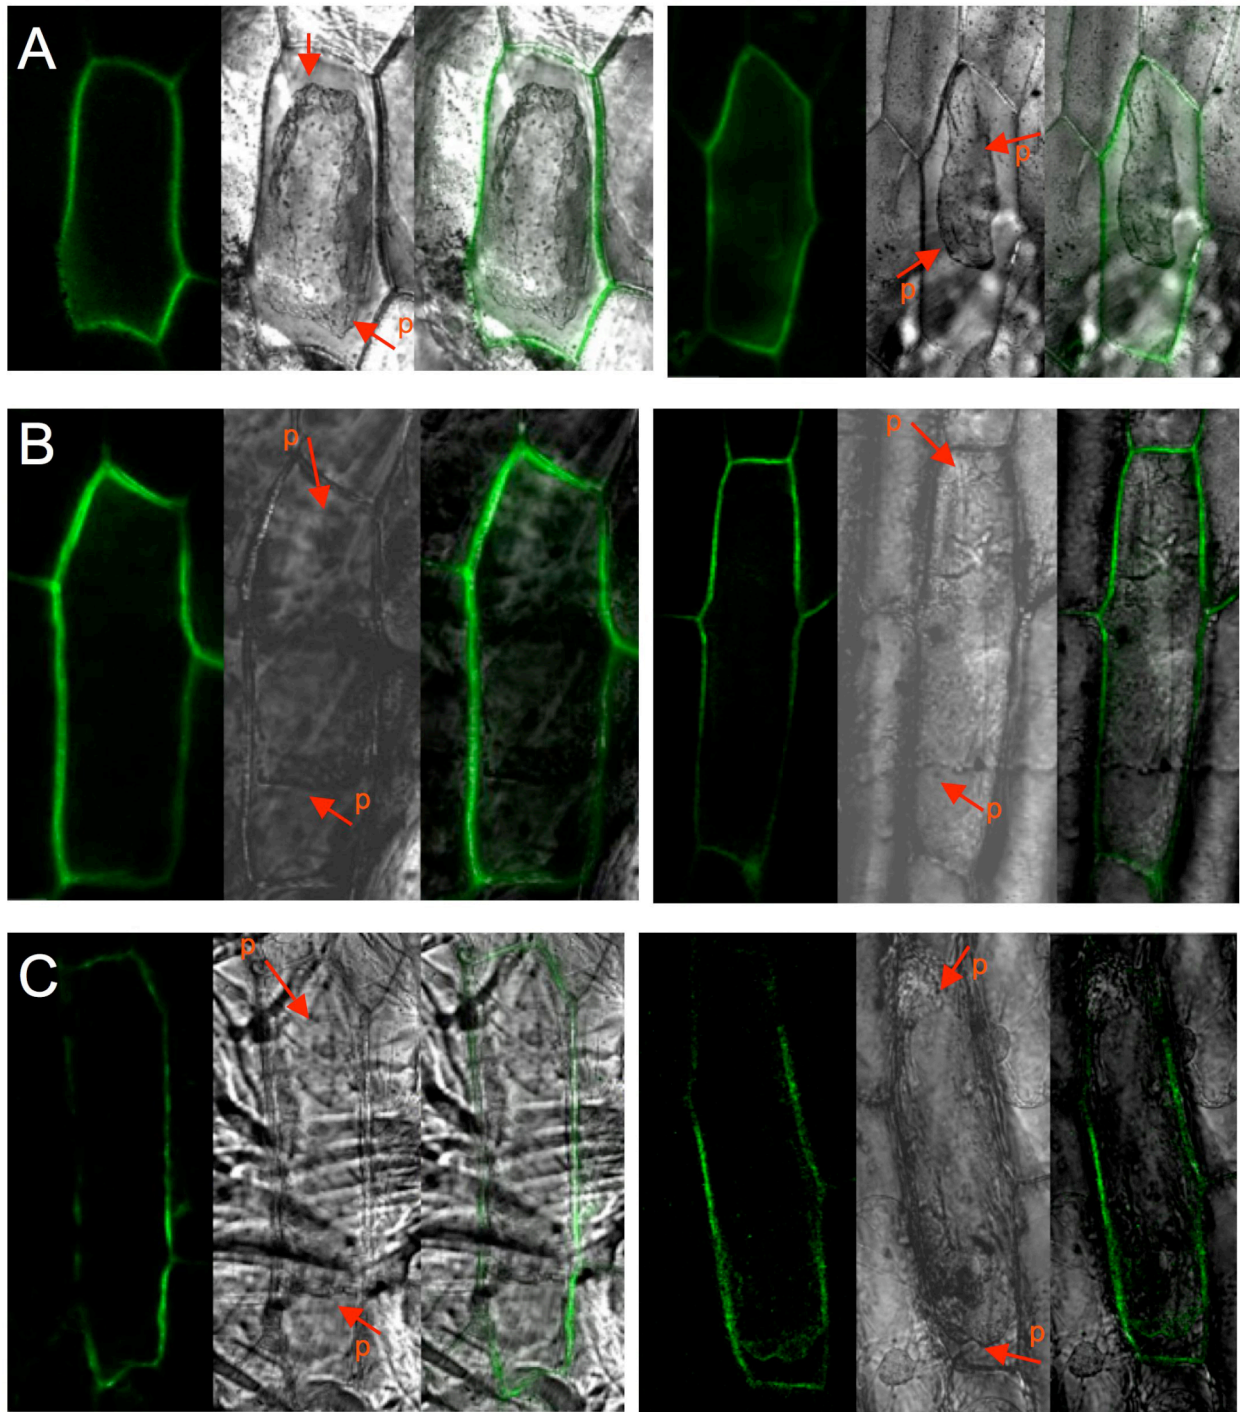

**Supplemental Figure 1.** Plasmolyzed onion bulb epidermal cells expressing secreted Avr1b-GFP fusion proteins.

DNA encoding various fusions of Avr1b with *Aequorea coerulescens* green fluorescent protein (GFP) was bombarded into onion epidermal cells. 24 hours later, plasmolysis was performed for 15 min in 0.8 M mannitol.

Each cell is shown three times in adjacent panels: fluorescent image (left), bright-field image (middle) and merged image (right). "p" indicates the plasma membrane in plasmolyzed cells.

- (A)** Fusion of GFP to the secretory leader of Avr1b alone (sGFP);
- (B)** GFP fused to Avr1b RXLR2<sup>AAA</sup> mutant including its secretory leader;
- (C)** GFP fused to Avr1b dEER<sup>A6</sup> mutant including its secretory leader.

| No | Name               | Applications                                                                                                                                | Sequence (from 5' to 3')*                                                               |
|----|--------------------|---------------------------------------------------------------------------------------------------------------------------------------------|-----------------------------------------------------------------------------------------|
| 1  | UF                 | <i>Hind</i> III and <i>Xma</i> I sites added to rpL41 promoter to drive G418 resistance gene                                                | ataagcttgaatTCTGGCGTTCATCTCCGACG                                                        |
| 2  | UR                 |                                                                                                                                             | ttcccggtTGGATGCTCAGATGctagcGTC                                                          |
| 3  | HamF               | <i>Bremia</i> Ham34 promoter internal primer                                                                                                | TTCTCCTTTTCACTCTCACG                                                                    |
| 4  | HamR               | <i>Bremia</i> Ham34 Terminator internal primer                                                                                              | AGACACAAAATCTGCAACTTC                                                                   |
| 5  | Avr1bReF           | <i>Avr1b-1</i> internal primers for PCR                                                                                                     | ACCTTCAGCGTGACTGACCT                                                                    |
| 6  | Avr1bReR           |                                                                                                                                             | GCGATTGCCAACCCAGTTCT                                                                    |
| 7  | ActinF             | <i>P. sojae</i> Actin gene internal primers for the reference in RT-PCR                                                                     | CGACATCCGTAAGGACCTGT                                                                    |
| 8  | ActinR             |                                                                                                                                             | TTCGAGATCCACATCTGCTG                                                                    |
| 9  | PrimerC            | <i>Kpn</i> I sites added flanking <i>Avr1b-1</i> for insertion downstream of HAM34 promoter                                                 | ggggtaccgacaacaATGCGTCTATCTTTTGTGCT                                                     |
| 10 | PrimerD            |                                                                                                                                             | ggggtaccTCAGCTCTGATACCGGTGAA                                                            |
| 11 | Avr1bF             | <i>Xho</i> I site and initiation codon added to 5' end of mature <i>Avr1b-1</i> for insertion downstream of CaMV 35S promoter               | atcgactcgagcttgcgagatcccgggggcaatgagatgACTGAGTACTCCGACGAA                               |
| 12 | Avr1bR             | <i>Xho</i> I site to 3' end of <i>Avr1b-1</i> for insertion downstream of CaMV 35S promoter                                                 | atcgactcgagcttgcgagatcccgggggcaatgagatgACTGAGTACTCCGACGAA                               |
| 13 | Avr1bfull_F        | Same as Avr1bF but for secretory <i>Avr1b-1</i>                                                                                             | atcgactcgagcttgcgagatcccgggggcaatgagatATGCGTCTATCTTTGTG                                 |
| 14 | Motif1F            | Introduction of RXLR1 <sup>AAAA</sup> mutation, creating a <i>Pst</i> I site                                                                | TCGTCCGTgctgcagctgctAACGGCGACATTGCCGGTGG                                                |
| 15 | Motif1R            |                                                                                                                                             | TGCCCGTTagcagctgcagcACGGACGAGATCTGGAGATT                                                |
| 16 | Motif2F            | Introduction of RXLR2 <sup>AAAA</sup> mutation, creating a <i>Pst</i> I site                                                                | CCGGTGGAgctgcagctgctGCTCATGAAGAGGACGATGC                                                |
| 17 | Motif2R            |                                                                                                                                             | TCATGAGCagcagctgcagcTCCACCGGCAATGTCGCCGT                                                |
| 18 | Motif1+2F          | Introduction of RXLR1 <sup>AAAA</sup> & RXLR2 <sup>AAAA</sup> mutations, creating 2 <i>Pst</i> I sites                                      | gctgcagctgctAACGGCGACATTGCCGGTGGAgctgcagctgctGC                                         |
| 19 | Motif1+2R          |                                                                                                                                             | TCATGAAGAGGACGATGC<br>agcagctgcagcTCCACCGGCAATGTCGCCGTTagcagctgcagcACGGACGAGATCTGGAGATT |
| 20 | Motif3F            | Introduction of dEER <sup>A6</sup> mutation, creating a <i>Pst</i> I site                                                                   | gctgcagcagctGCGGGGgctgctACCTTCAGCGTGACTGACCT                                            |
| 21 | Motif3R            |                                                                                                                                             | agcagcCCCCGCagctgctgcagcATGAGCTCGAAGAAATCTTC                                            |
| 22 | HpAvh341F          | 5' flanking <i>Xma</i> I site added to HpAvh341 for insertion downstream of HAM34 promoter                                                  | attcccggtgacaacaATGCGACTCCACTACGTG                                                      |
| 23 | HpAvh341R          | For fusion with <i>Avr1b-1</i>                                                                                                              | GTCAGTCACGCTGAAGGTATCGAGAACGCCATGCCCAT                                                  |
| 24 | PsAvh171F          | 5' flanking <i>Xma</i> I site added to PsAvh171 for insertion downstream of HAM34 promoter                                                  | attcccggtgacaacaATGGGCCTCCACAAGGGCT                                                     |
| 26 | PsAvh171R          | For fusion with <i>Avr1b-1</i>                                                                                                              | GTCAGTCACGCTGAAGGTITAGGTGGTGTAGTCCGAC                                                   |
| 26 | 1bRXLR(-)F         | For deletion of N-terminus of <i>Avr1b-1</i>                                                                                                | aaaccgggacaacaatgACCTTCAGCGTGACTGAC                                                     |
| 27 | Avr1b_EcoRI        | Primers for making moving Avr1b expression cassette into pUC19 vector with <i>Xma</i> I and <i>Kpn</i> I sites flanking <i>Avr1b-1</i> gene | GGAGgaaTTcGCTGGCTGGTGGCAGGAT                                                            |
| 28 | Avr1b_HindIII      |                                                                                                                                             | GTATTGGCTAGAGaAGCTTGCCA                                                                 |
| 29 | Avr1b_genegun_KpnI |                                                                                                                                             | AGAAACTCGAGCTTGTGCGATCGACAGATCCGGTCGGCA<br>ggTACcTCAGCTCTGATAC                          |
| 30 | M2_F1              | Replacement of RFLR with mutation encoding RFRL                                                                                             | GAAGATTTcgaCttGCTCATGAAG                                                                |
| 31 | M2_R1              |                                                                                                                                             | CTTCATGAGCaaGtcGAAATCTTC                                                                |
| 32 | M2_F2              | Replacement of RFLR with the mutation encoding FRLR                                                                                         | TGCCGGTGGAtttagaCTTCGAGCTC                                                              |
| 33 | M2_R2              |                                                                                                                                             | GAGCTCGAAGtctaaaTCCACCGGCA                                                              |
| 34 | M2_F3              | Replacement of RFLR with the                                                                                                                | GAAGATTTgcaCGAGCTCAT                                                                    |

|    |          |                                                                                                                 |                                                               |
|----|----------|-----------------------------------------------------------------------------------------------------------------|---------------------------------------------------------------|
| 35 | M2_R3    | mutation encoding RFAR                                                                                          | ATGAGCTCGtgcAAATCTTC                                          |
| 36 | M2_F4    | Replacement of RFLR with the mutation encoding QFLQ                                                             | GGTGGAcagTTTCTTCaaGCTCATGAAG                                  |
| 37 | M2_R4    |                                                                                                                 | AGCttGAAGAAActgTCCACCGGCA ATG                                 |
| 38 | GFPPF    | For fusion with <i>Avr1b-1</i> to make <i>Avr1b-1-AcGFP</i>                                                     | CTTTCACCGGTATCAGAGClggtaccgccacclatgGTGAGCAAG<br>GGCGCCGAG    |
| 39 | GFPR     | Addition of <i>Kpn</i> I after stop codon of GFP                                                                | AA <u>G</u> taCCtcaCTTGTACAGCTCATCCAT                         |
| 40 | Avr1bSac | Addition of NgoMIV site upstream of RFLR                                                                        | TCATGAGCTCGAAGAA ATCTTCC <u>g</u> CCGGCA ATG                  |
| 41 | AvrRFLQ  | Replacement of RFLR with the mutation encoding RFLQ                                                             | CATTGCCGGcGGAAGATTTCTTCaAGC                                   |
| 42 | AvrQFLR  | Replacement of RFLR with the mutation encoding QFLR                                                             | CATTGCCGGcGGAcaATTTTC                                         |
| 43 | AvrRFVR  | Replacement of RFLR with the mutation encoding RFVR                                                             | CATTGCCGGcGGAAGATTTgTTC                                       |
| 44 | AvrKFLR  | Replacement of RFLR with the mutation encoding KFLR                                                             | CATTGCCGGcGGA <u>A</u> gTTTCTTC                               |
| 45 | Avr9R1   | Replacement of RFLR with the sequence encoding the 9 arginine motif                                             | cgtcgacgtcgggcagcGCTCATGAAGAGGACGATG                          |
| 46 | Avr9R2   |                                                                                                                 | CATTGCCGGcGGAcgacggcagctcgacgtcgggcagc                        |
| 47 | AvrTAT1  | Replacement of RFLR with the sequence encoding the TAT motif                                                    | taagaaacgccgtcagcagctcgaGCTCATGAAGAGGACGATG                   |
| 48 | AvfrTAT2 |                                                                                                                 | CATTGCCGGcGGAatgagcgtgaagaaacgccgtcagc                        |
| 49 | GBPF1    | Replacement of RFLR-dEER with the sequence from Pf GBP130                                                       | gaaggagaagactacactccggaaaagcaagcaaaaglACCTTCAGCGTGA<br>CTGACC |
| 50 | GBPF2    |                                                                                                                 | ctcgtactactggcagaggcgaagatacctgcgcaaggaaggagaagactacact       |
| 51 | GBPF3    |                                                                                                                 | gtatgagaagcggtagattacggcttccgagagtctcgtatactggcagag           |
| 52 | GBPR     |                                                                                                                 | ctaccgctttctatactatclTGCGTTGCAGGTCACGAC                       |
| 53 | HRPF1    | Replacement of RFLR-dEER with the sequence from Pf HRPII                                                        | tgtcgacgatgcaccatgacaccatggtgcagatACCTTCAGCGTGACT<br>GACC     |
| 54 | HRPF2    |                                                                                                                 | aacctcaacaagagactgttgcacgagacacaagcacatgtcgacgatgcgacc        |
| 55 | HRPF3    |                                                                                                                 | acaataacctgtgtagtaagaatgctaaggcttgaacctcaacaagagactg          |
| 56 | HRPR1    |                                                                                                                 | actacacaggtattgttaaalTGCGTTGCAGGTCACGAC                       |
| 57 | 1615F1   | Replacement of RFLR-dEER with the sequence from Pf 1615c                                                        | cagtcaatgcattacaagaaatgtagatgatgtgtclACCTTCAGCGTGACT<br>GACC  |
| 58 | 1615F2   |                                                                                                                 | ctcaagcagttggagttcatcacattggaagagaagacagtcattacaag            |
| 59 | 1615F3   |                                                                                                                 | aagatcaactcgtcactactatacacacagtagaataactcaagcagttggagttc      |
| 60 | 1615R1   |                                                                                                                 | agatgacgagttgatctgtgtaactTGCGTTGCAGGTCACGAC                   |
| 61 | AvrGFPPF | Replacement of codons encoding nine arginine motif in pR9GFP with <i>Avr1b</i> residues 33 to 71 from wild type | gatctagatctGTGGAATCTCCAGATCTC                                 |
| 62 | AvrGFPR1 | <i>Avr1b</i> or from <i>Avr1b</i> RXLR or dEER mutants                                                          | GTCATATGGATAGCCGGACATIGTCAGTCACGCTGAAG<br>GT                  |
| 63 | AvrGFPR2 |                                                                                                                 | GATCCCATGGAGCCAGCATAGTCTGGGACGTCATATGG<br>ATAGCCGGA           |

**Supplemental Table 1.** Oligonucleotides used for PCR and plasmid construction.

Uppercase letters indicate bases that match the initial template. Lower case letters indicate mutations or 5' extensions that do not match the initial template. Restriction sites introduced into the amplicon are underlined. A pipe (|) indicates the boundary between *Avr1b-1* sequences and fused sequences (*Avh*, GFP or *Plasmodium* RXLX motif) in the fusion oligonucleotides.

| No | Plasmid Name   | Sources        | Construct                                                                                                                                         | Construction strategy                                                                                                        |
|----|----------------|----------------|---------------------------------------------------------------------------------------------------------------------------------------------------|------------------------------------------------------------------------------------------------------------------------------|
| 1  | pUN            | pHAMT35N (5)   | <i>Npt</i> II gene for G418 resistance fused to <i>P. sojae</i> rpL41 promoter in pUC19                                                           | Ham34 promoter of pHAMT35N replaced by <i>P. sojae</i> rpL41 promoter using primers UF and UR                                |
| 2  | pHamAvr1b      | pHAMT35N       | <i>Avr1b-1</i> gene fused to Ham34 promoter and terminator for <i>P. sojae</i> transformation in pUC19                                            | <i>Npt</i> II gene of pHAMT35N replaced with <i>P. sojae Avr1b-1</i> using PrimerC and PrimerD                               |
| 3  | M1             | pHAMT35N       | <i>Avr1b-1</i> (RXLR1 <sup>AAAA</sup> ) mutant fused to Ham34 promoter and terminator                                                             | Same as pHamAvr1b with mutation introduced by primers motif1F and motif1R                                                    |
| 4  | M2             | pHAMT35N       | <i>Avr1b-1</i> (RXLR2 <sup>AAAA</sup> ) mutant fused to Ham34 promoter and terminator                                                             | Same as pHamAvr1b with mutation introduced by primers motif2F and motif2R                                                    |
| 5  | M1+2           | pHAMT35N       | <i>Avr1b-1</i> (RXLR1 <sup>AAA</sup> A,2 <sup>AAAA</sup> ) mutant fused to Ham34 promoter and terminator                                          | Same as pHamAvr1b with mutation introduced by primers motif1+2F and motif1+2R                                                |
| 6  | M3             | pHAMT35N       | <i>Avr1b-1</i> (dEER <sup>A6</sup> ) mutant fused to Ham34 promoter and terminator                                                                | Same as pHamAvr1b with mutation introduced by primers motif3F and motif3R                                                    |
| 7  | pHamAvh341     | pHAMT35N       | <i>HpAvh341</i> fused with C-terminal domain of <i>Avr1b-1</i> , driven by Ham34 promoter and terminator                                          | <i>Npt</i> II gene replaced with <i>HpAvh341-Avr1b</i> fusion using primers <i>HpAvh341F</i> , <i>HpAvh341R</i> and PrimerD  |
| 8  | pHamAvh171     | pHAMT35N       | <i>Ps Avh171</i> (=Avr4/6) fused with C-terminal of <i>Avr1b-1</i> driven by Ham34 promoter and terminator                                        | <i>Npt</i> II gene replaced with <i>Ps Avh171-Avr1b</i> fusion using primers <i>PsAvh171F</i> , <i>PsAvh171R</i> and PrimerD |
| 9  | pHamAvr1bCt    | pHAMT35N       | C-terminus of <i>Avr1b-1</i> gene fused to Ham34 promoter and terminator for <i>P. sojae</i> transformation in pUC19                              | <i>Npt</i> II gene of pHAMT35N replaced with <i>P. sojae Avr1b-1</i> C terminus using primers 1bRXLR(-)F and PrimerD         |
| 10 | UNM1           | pUN and M1     | Ham34:: <i>Avr1b</i> (RXLR1 <sup>AAAA</sup> ) inserted together with rpL41:: <i>Npt</i> II for <i>P. sojae</i> transformation                     | Selection and Gus expression cassettes in pCambia1305.2 replaced by inserts from pUN and M1, respectively                    |
| 11 | UNM2           | pUN and M2     | Ham34:: <i>Avr1b</i> (RXLR2 <sup>AAAA</sup> ) inserted together with rpL41:: <i>Npt</i> II for <i>P. sojae</i> transformation                     | Selection and Gus expression cassettes in pCambia1305.2 replaced by inserts from pUN and M2, respectively                    |
| 12 | UNM1+2         | pUN and M1+2   | Ham34:: <i>Avr1b</i> (RXLR1 <sup>AAAA</sup> A,2 <sup>AAAA</sup> ) inserted together with rpL41:: <i>Npt</i> II for <i>P. sojae</i> transformation | Selection and Gus expression cassettes in pCambia1305.2 replaced by inserts from pUN and M1+2, respectively                  |
| 13 | UNM3           | pUN and M3     | Ham34:: <i>Avr1b</i> (dEER <sup>A6</sup> ) inserted together with rpL41:: <i>Npt</i> II for <i>P. sojae</i> transformation                        | Selection and Gus expression cassettes in pCambia1305.2 replaced by inserts from pUN and M3, respectively                    |
| 14 | pCambiaAvr1b   | pCambia1305.2  | CaMV 35S promoter fused to full length <i>Avr1b-1</i> in GUS-containing vector                                                                    | HMT gene in pCambia1305.2 replaced by <i>Avr1b-1</i> using primers <i>Avr1bfull_F</i> and <i>Avr1bR</i>                      |
| 15 | pCambiaM2      | pCambia1305.2  | CaMV 35S promoter fused to <i>Avr1b-1</i> (RXLR2 <sup>AAAA</sup> ) in GUS-containing vector                                                       | HMT gene in pCambia1305.2 replaced by <i>Avr1b</i> (RXLR2) using primers <i>Avr1bfull_F</i> and <i>Avr1bR</i>                |
| 16 | pCambia-mAvr1b | pCambia1305.2  | CaMV 35S promoter fused to leaderless <i>Avr1b-1</i> in GUS-containing vector                                                                     | HMT gene in pCambia1305.2 replaced by mature <i>Avr1b-1</i> using primers <i>Avr1bF</i> and <i>Avr1bR</i>                    |
| 17 | pCambia-mM2    | pCambia1305.2  | CaMV 35S promoter fused to leaderless <i>Avr1b-1</i> (RXLR2 <sup>AAAA</sup> ) in GUS-containing vector                                            | HMT gene in pCambia1305.2 replaced by m <i>Avr1b</i> (RXLR2) using primers <i>Avr1bF</i> and <i>Avr1bR</i>                   |
| 18 | pCa-GUS(-)     | pCambia1305.2  | Empty vector as the control                                                                                                                       | GUS expression cassette was removed by <i>Sph</i> I restriction and re-ligation for co-transformation experiments            |
| 19 | pCaAvr1b       | pCambiaAvr1b   | CaMV 35S promoter fused to <i>Avr1b-1</i> in GUS-free vector                                                                                      |                                                                                                                              |
| 20 | pCaM2          | pCambiaM2      | CaMV 35S promoter fused to <i>Avr1b-1</i> (RXLR2 <sup>AAAA</sup> ) in GUS-free vector                                                             |                                                                                                                              |
| 21 | pCa-mAvr1b     | pCambia-mAvr1b | CaMV 35S promoter fused to leaderless <i>Avr1b-1</i> in GUS-free vector                                                                           |                                                                                                                              |
| 22 | pCa-mM2        | pCambia-mM2    | CaMV 35S promoter fused to leaderless <i>Avr1b-1</i> (RXLR2 <sup>AAAA</sup> ) in GUS-free vector                                                  |                                                                                                                              |
| 23 | pUCAvr1b       | pCambiaAvr1b   | CaMV 35S promoter fused to <i>Avr1b-1</i> with <i>Xma</i> I site                                                                                  | <i>Avr1b</i> expression cassette was inserted into pUC19 by PCR with primers <i>Avr1b_EcoRI</i>                              |
| 23 | pUCAvr1b       | pCambiaAvr1b   | CaMV 35S promoter fused to <i>Avr1b-1</i> with <i>Xma</i> I site                                                                                  | <i>Avr1b</i> expression cassette was inserted into pUC19 by PCR with primers <i>Avr1b_EcoRI</i> and <i>Avr1b_HindIII</i>     |

|    |                  |                   |                                                                                                                                                   |                                                                                                                                                                               |
|----|------------------|-------------------|---------------------------------------------------------------------------------------------------------------------------------------------------|-------------------------------------------------------------------------------------------------------------------------------------------------------------------------------|
| 24 | pUCAvr1bXK       | pUCAvr1b          | <i>Kpn</i> I site added to 3' end pUCAvr1b to facilitate later constructions                                                                      | Amplification with primers Avr1b_EcoRI, Avr1b_HindIII and Avr1b_genegun_KpnI                                                                                                  |
| 25 | pUCmAvr1b(dEER)  | pUCAvr1bXK and M3 | CaMV 35S promoter fused to mature <i>Avr1b-1</i> (dEER <sup>A6</sup> ) using <i>Xma</i> I and <i>Kpn</i> I sites                                  | Ligation of <i>Xma</i> I- <i>Kpn</i> I fragment from M3 into pUCAvr1bXK                                                                                                       |
| 26 | pUCmAvr1bGFP     | pAcGFP1-N         | Fusion of leaderless <i>Avr1b-1</i> with <i>AcGFP</i> from pAcGFP1-N (Clontech, # 632485) placed under control of CaMV 35S promoter               | AcGFP fused to relevant Avr1b sequence by PCR with primers Avr1bF or Avr1bfull_F plus GFPF and GFPR. PCR product inserted into pUCAvr1bXK using <i>Xma</i> I and <i>Kpn</i> I |
| 27 | pUCsAvr1bGFP     | pUCAvr1bXK        | Fusion of normal <i>Avr1b-1</i> with <i>AcGFP</i> placed under control of CaMV 35S promoter                                                       | Deletion of Avr1b sequences by self-ligation of <i>Xma</i> I/Age I restricted pUCsAvr1bGFP                                                                                    |
| 28 | pUCGFP           | pUCsAvr1bGFP      | CaMV 35S promoter fused to <i>AcGFP</i>                                                                                                           | Deletion of Avr1b sequences encoding mature protein by self-ligation of <i>Nco</i> I restricted pUCsAvr1bGFP                                                                  |
| 29 | pUCsGFP          |                   | CaMV 35S promoter fusion of Avr1b secretory leader to <i>AcGFP</i> placed under control of CaMV 35S promoter                                      |                                                                                                                                                                               |
| 30 | pUCM2GFP         | pUCAvr1bXK        | <i>Avr1b-1</i> (RXLR2 <sup>AAAA</sup> )- <i>AcGFP</i> fusion placed under control of CaMV 35S promoter                                            | AcGFP fused to relevant Avr1b sequence by PCR with primers Avr1bfull_F, GFPF and GFPR. PCR product inserted into pUCAvr1bXK using <i>Xma</i> I and <i>Kpn</i> I               |
| 31 | pUCM3GFP         |                   | <i>Avr1b-1</i> (dEER <sup>A6</sup> )- <i>AcGFP</i> fusion placed under control of CaMV 35S promoter                                               |                                                                                                                                                                               |
| 32 | pUCAvr1b(R9)GFP  |                   | <i>Avr1b-1</i> (RXLR2 <sup>Arg9</sup> )- <i>AcGFP</i> fusion placed under control of CaMV 35S promoter                                            |                                                                                                                                                                               |
| 33 | pUCAvr1b(TAT)GFP |                   | <i>Avr1b-1</i> (RXLR2 <sup>TAT</sup> )- <i>AcGFP</i> fusion placed under control of CaMV 35S promoter                                             |                                                                                                                                                                               |
| 34 | pUCNgo           | pUCAvr1bXK        | Addition of NgoMIV site upstream of RFLR in N-terminus of Avr1b (T150C) in pUCAvr1bXK to facilitate later manipulations                           | GCCGGT in was mutated to GCCGGc using primer Avr1bSac                                                                                                                         |
| 35 | pUCRFRL          | pUCAvr1bXK        | CaMV 35S promoter fused to <i>Avr1b-1</i> genes carrying indicated mutations                                                                      | Wild type Avr1b in pUCAvr1bXK was replaced with the corresponding mutants using <i>Xma</i> I and <i>Kpn</i> I                                                                 |
| 36 | pUCFRLR          |                   |                                                                                                                                                   |                                                                                                                                                                               |
| 37 | pUCRFAR          |                   |                                                                                                                                                   |                                                                                                                                                                               |
| 38 | pUCQFLQ          |                   |                                                                                                                                                   |                                                                                                                                                                               |
| 39 | pUCQFLR          | pUCNgo            | CaMV 35S promoter fused to <i>Avr1b-1</i> genes carrying indicated mutations                                                                      | Avr1b in pUCNgo was replaced with the corresponding mutants by <i>NgoMIV</i> and <i>Kpn</i> I                                                                                 |
| 40 | pUCKFLR          |                   |                                                                                                                                                   |                                                                                                                                                                               |
| 41 | pUCRFQLQ         |                   |                                                                                                                                                   |                                                                                                                                                                               |
| 42 | pUCRFVR          |                   |                                                                                                                                                   |                                                                                                                                                                               |
| 43 | pUCAvr9R         |                   |                                                                                                                                                   |                                                                                                                                                                               |
| 44 | pUCAvrTAT        |                   |                                                                                                                                                   |                                                                                                                                                                               |
| 45 | pUCAvrPfGBP      | pUCAvr1bXK        | CaMV 35S promoter fused to <i>Avr1b-1</i> genes carrying indicated mutations                                                                      | Wild type Avr1b in pUCAvr1bXK was replaced with the corresponding mutants using <i>Xma</i> I and <i>Kpn</i> I                                                                 |
| 46 | pUCAvrPfHRP      |                   |                                                                                                                                                   |                                                                                                                                                                               |
| 47 | pUCAvrPf1615     |                   |                                                                                                                                                   |                                                                                                                                                                               |
| 48 | pAvr1bGFP        | pR9GFP            | Replacement of codons encoding nine arginine motif in pR9GFP with Avr1b residues 33 to 71 from wild type Avr1b or from Avr1b RXLR or dEER mutants | Amplification with primers AvrGFPF, AvrGFPFPR1 and AvrGFPFPR2                                                                                                                 |
| 49 | pAvr1b(M1+2)GFP  |                   |                                                                                                                                                   |                                                                                                                                                                               |
| 50 | pAvr1b(M3)GFP    |                   |                                                                                                                                                   |                                                                                                                                                                               |

**Supplemental Table 2.** Description of Plasmids Used

| Transgene                                          | Transformation Strategy <sup>a</sup> | Numbers of Positive Clones |                  |                     |                         | Clones used in this study <sup>f</sup> |
|----------------------------------------------------|--------------------------------------|----------------------------|------------------|---------------------|-------------------------|----------------------------------------|
|                                                    |                                      | G418 Growth <sup>b</sup>   | PCR <sup>c</sup> | RT-PCR <sup>d</sup> | Efficiency <sup>e</sup> |                                        |
| GUS                                                | Single plasmid                       | 22                         | NT               | 4 <sup>g</sup>      | 18.2%                   | 1                                      |
| sAvr1b(WT)                                         | Co-transformation                    | 44                         | 6                | 2                   | 4.5%                    | 2                                      |
| sAvr1b(RXLR1 <sup>AAAA</sup> )                     | Single plasmid                       | 9                          | 7                | 3                   | 33.3%                   | 3                                      |
| sAvr1b(RXLR2 <sup>AAAA</sup> )                     | Single plasmid                       | 20                         | 13               | 5                   | 25.0%                   | 2                                      |
| sAvr1b(RXLR1 <sup>AAAA</sup> , 2 <sup>AAAA</sup> ) | Single plasmid                       | 9                          | 6                | 4                   | 44.4%                   | 2                                      |
| sAvr1b(dEER <sup>A6</sup> )                        | Single plasmid                       | 3                          | 1                | 1                   | 33.3%                   | 1                                      |
| sAvr1b(dEER <sup>A6</sup> )                        | Co-transformation                    | 12                         | 2                | 1                   | 8.3%                    | 1                                      |
| Ps <i>Avh171-Avr1bCt</i>                           | Co-transformation                    | 28                         | 6                | 2                   | 7.1%                    | 2                                      |
| Hp <i>Avh341-Avr1bCt</i>                           | Co-transformation                    | 22                         | 5                | 2                   | 9.1%                    | 2                                      |

**Supplemental Table 3.** Efficiency of PEG-mediated *P. sojae* protoplast transformation.

a For each transformation,  $0.5\sim 2 \times 10^7$  protoplasts were used and 1-3 transformation experiments were carried out. In some cases the transgene was inserted into the same plasmid as the selectable marker and in some cases the transgene was introduced by co-transformation.

b Number of G418 resistant colonies surviving after three rounds of selection on 50 ug/ml G418.

‡ Number of colonies in which the transgene could be detected by PCR from genomic DNA. NT = not tested.

d Number of colonies in which Avr1b mRNA could be detected by RT-PCR. In colonies with no detectable Avr1b transgene mRNA, the endogenous Avr1b gene was often silenced.

e percentage of G418 resistant colonies confirmed to express the transgene by RT-PCR.

f All the RT-PCR positive clones had similar expression levels for a give transgene.

g The 22 putative GUS gene transformants were assessed for transgene expression by staining for beta-glucuronidase activity with 5-bromo-4-chloro-3-indolyl- beta-D-glucuronic acid (X-gluc), rather than RT-PCR.
